# Supplementary material
Source: MDPI journal article supplement (https://www.mdpi.com/2073-4441/14/18/2901)
Supplement: s1 [file s1]

## Supplementary Materials

# Economic Analysis of Flood Risk Applied to the Rehabilitation of Drainage Networks

## Supplementary Materials

In the manuscript referred above, two cases study was used to present the validity of the method described. It is the aim of the authors to allow any researcher to be able to reproduce the results obtained. For this reason, the data and the results are included in this supplementary material. Also, information on obtaining flood damage curves based on land use is shown.

### 1. Case Study Data of Balloon Network

Balloon network is presented in the Figure S1 below.

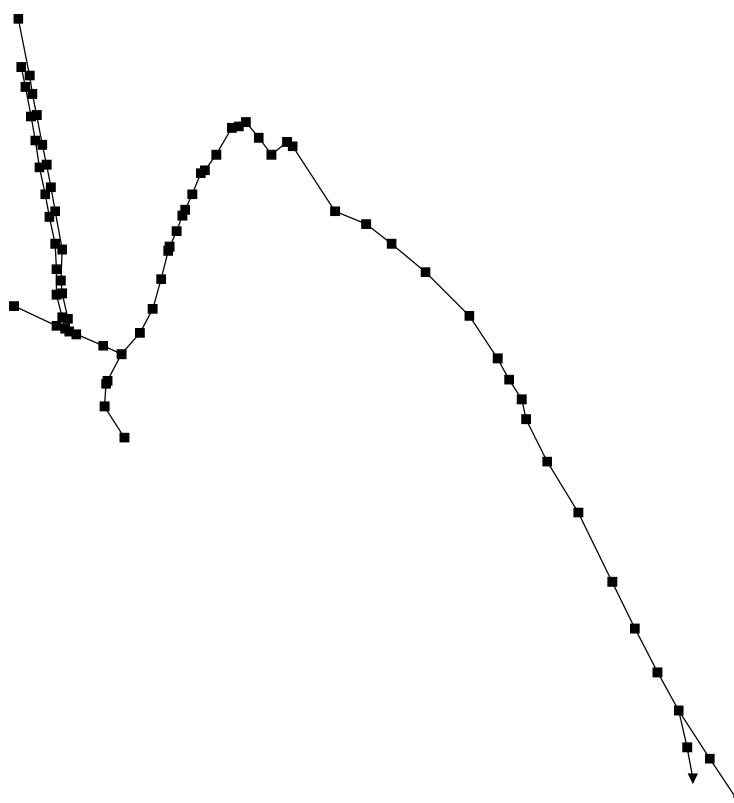

**Figure S1.** Representation of Balloon drainage network.

Table S1. Data for nodes and subcatchments of Balloon network.

| Node ID | Invert Elevation (m) | Max. Depth (m) | Flooding Area (m <sup>2</sup> ) | Sub-catchment Area (ha) | Impervious Area (%) | Width (m) | Slope (%) |
|---------|----------------------|----------------|---------------------------------|-------------------------|---------------------|-----------|-----------|
| N1      | 225.914              | 1.46           | 86.09                           | 0.08609                 | 85                  | 31.89     | 86.00     |
| N2      | 225.395              | 1.73           | 67.87                           | 0.06787                 | 85                  | 31.81     | 75.00     |
| N3      | 225.017              | 1.98           | 10                              | 0                       | 85                  | 0.00      | 0.00      |
| N4      | 225.003              | 1.97           | 100.7                           | 0.1007                  | 85                  | 32.84     | 61.00     |
| N5      | 224.648              | 2.1            | 66.84                           | 0.08684                 | 85                  | 31.83     | 58.00     |
| N6      | 224.628              | 2.1            | 1211                            | 1.30363                 | 85                  | 37.20     | 265.00    |
| N7      | 223.493              | 2.54           | 136.1                           | 0.1361                  | 85                  | 49.94     | 257.00    |
| N8      | 223.328              | 1.92           | 145.1                           | 0.1451                  | 85                  | 51.82     | 224.00    |
| N9      | 223.202              | 1.86           | 10                              | 0                       | 85                  | 0.00      | 0.00      |
| N10     | 223.223              | 1.81           | 138                             | 0.138                   | 85                  | 44.52     | 67.00     |
| N11     | 223.153              | 1.81           | 116                             | 0.116                   | 85                  | 34.12     | 41.00     |
| N12     | 223.077              | 1.82           | 87                              | 0.087                   | 85                  | 23.36     | 39.00     |
| N13     | 223.015              | 1.86           | 88                              | 0.088                   | 85                  | 21.46     | 44.00     |
| N14     | 223.081              | 1.94           | 121                             | 0.121                   | 85                  | 40.33     | 122.00    |
| N15     | 222.934              | 2.52           | 10                              | 0                       | 85                  | 0.00      | 0.00      |
| N16     | 222.844              | 2.58           | 20,659.8                        | 22.2588                 | 85                  | 195.79    | 185.00    |
| N17     | 222.833              | 2.7            | 48                              | 0.048                   | 85                  | 29.54     | 73.00     |
| N18     | 222.895              | 3.4            | 40                              | 0.04                    | 85                  | 24.24     | 218.00    |
| N19     | 222.778              | 3.63           | 23                              | 0.023                   | 85                  | 12.96     | 226.00    |
| N20     | 222.751              | 3.53           | 1060                            | 1.398                   | 85                  | 94.43     | 295.00    |
| N21     | 222.94               | 3.53           | 70                              | 0.07                    | 85                  | 33.73     | 0.36      |
| N22     | 222.867              | 3.7            | 35                              | 0.035                   | 85                  | 24.14     | 295.50    |
| N23     | 222.48               | 5.05           | 184                             | 0.184                   | 85                  | 63.45     | 295.50    |
| N24     | 222.4                | 10.14          | 213                             | 0.213                   | 85                  | 52.38     | 977.00    |
| N25     | 222.35               | 9.92           | 90                              | 0.09                    | 85                  | 34.29     | 57.00     |
| N26     | 222.31               | 7.96           | 95                              | 0.095                   | 85                  | 35.19     | 606.00    |
| N27     | 222.24               | 5.29           | 136                             | 0.136                   | 85                  | 42.17     | 583.00    |
| N28     | 222.18               | 4.21           | 137                             | 0.137                   | 85                  | 41.52     | 209.00    |
| N29     | 222.12               | 4.16           | 103                             | 0.103                   | 85                  | 40.39     | 21.00     |
| N30     | 222                  | 4.08           | 5630                            | 5.676                   | 85                  | 139.13    | 200.00    |
| N31     | 221.95               | 3.82           | 41                              | 0.041                   | 85                  | 22.69     | 129.00    |
| N32     | 221.88               | 3.78           | 61                              | 1.081                   | 85                  | 30.12     | 55.00     |
| N33     | 221.87               | 3.05           | 138                             | 0.138                   | 85                  | 47.18     | 140.00    |
| N34     | 221.8                | 2.76           | 579                             | 0.579                   | 85                  | 98.55     | 89.00     |
| N35     | 221.78               | 2.62           | 473                             | 0.473                   | 85                  | 72.49     | 40.00     |
| N36     | 221.69               | 2.63           | 306                             | 0.306                   | 85                  | 51.21     | 24.00     |
| N37     | 221.66               | 2.6            | 253                             | 0.253                   | 85                  | 50.85     | 23.00     |
| N38     | 221                  | 3.35           | 255                             | 0.255                   | 85                  | 61.45     | 31.00     |
| N39     | 220.9                | 3.4            | 183                             | 0.183                   | 85                  | 58.56     | 12.00     |
| N41     | 222.805              | 3.48           | 65                              | 0.065                   | 85                  | 26.80     | 3.00      |
| N43     | 220.95               | 3.2            | 10                              | 0                       | 85                  | 0.00      | 0.00      |
| N45     | 228.833              | 1.33           | 71                              | 0.071                   | 85                  | 20.88     | 433.00    |
| N46     | 227.046              | 1.38           | 56                              | 0.056                   | 85                  | 20.74     | 319.00    |
| N47     | 226.66               | 1.016          | 30                              | 0.03                    | 85                  | 16.22     | 117.00    |
| N48     | 226.28               | 1.14           | 314                             | 0.314                   | 85                  | 38.06     | 25.00     |
| N49     | 226.216              | 1.14           | 185                             | 0.185                   | 85                  | 23.13     | 68.00     |
| N50     | 226.103              | 1.08           | 186                             | 0.186                   | 85                  | 23.40     | 45.00     |

|     |         |       |     |       |    |       |        |
|-----|---------|-------|-----|-------|----|-------|--------|
| N51 | 226.013 | 1.04  | 169 | 0.169 | 85 | 21.26 | 47.00  |
| N52 | 225.984 | 0.95  | 226 | 0.226 | 85 | 28.25 | 27.00  |
| N53 | 225.869 | 0.914 | 341 | 0.341 | 85 | 43.35 | 15.00  |
| N54 | 225.73  | 1.016 | 158 | 0.158 | 85 | 22.25 | 284.00 |
| N55 | 225.685 | 1.57  | 123 | 0.123 | 85 | 18.36 | 46.00  |
| N56 | 225.591 | 1.8   | 89  | 0.089 | 85 | 17.28 | 154.00 |
| N57 | 225.269 | 2.12  | 8   | 0.028 | 85 | 4.21  | 84.00  |
| N58 | 227.264 | 1.47  | 50  | 0.05  | 85 | 8.33  | 346.00 |
| N59 | 226.369 | 1.38  | 106 | 0.106 | 85 | 17.10 | 116.00 |
| N60 | 226.161 | 1.24  | 217 | 0.217 | 85 | 29.17 | 31.00  |
| N61 | 226.092 | 1.23  | 235 | 0.235 | 85 | 28.83 | 52.00  |
| N62 | 226.008 | 1.18  | 214 | 0.214 | 85 | 25.94 | 47.00  |
| N63 | 225.989 | 1.08  | 201 | 0.201 | 85 | 24.07 | 62.00  |
| N64 | 225.924 | 0.99  | 256 | 0.256 | 85 | 29.94 | 36.00  |
| N65 | 225.776 | 1.06  | 90  | 0.09  | 85 | 20.69 | 9.00   |
| N66 | 225.67  | 1.191 | 149 | 0.149 | 85 | 17.84 | 143.00 |
| N67 | 225.584 | 1.65  | 121 | 0.121 | 85 | 14.07 | 75.00  |
| N68 | 225.396 | 2.06  | 21  | 0.021 | 85 | 16.15 | 84.00  |
| N69 | 225.297 | 2.12  | 22  | 0.022 | 85 | 9.36  | 120.00 |
| N70 | 226.795 | 1.3   | 640 | 0.64  | 85 | 46.97 | 120.00 |
| N71 | 225.399 | 2.119 | 100 | 0.1   | 85 | 34.48 | 120.00 |
| N72 | 225.195 | 2.14  | 60  | 0.06  | 85 | 24.32 | 125.00 |
| N73 | 224.979 | 2.03  | 70  | 0.07  | 85 | 32.18 | 97.00  |

Table S2. Data for conduits in the network used as a case study.

| Link ID | Node 1 | Node 2 | Length (m) | Manning Roughness | Diameter (m) |
|---------|--------|--------|------------|-------------------|--------------|
| C1      | N1     | N2     | 29.00      | 0.017             | 0.7          |
| C2      | N2     | N3     | 17.00      | 0.017             | 0.7          |
| C3      | N3     | N4     | 2.00       | 0.017             | 0.7          |
| C4      | N4     | N5     | 39.00      | 0.017             | 0.7          |
| C5      | N5     | N6     | 29.00      | 0.017             | 0.7          |
| C6      | N6     | N7     | 26.50      | 0.017             | 0.95         |
| C7      | N7     | N8     | 35.00      | 0.017             | 0.95         |
| C8      | N8     | N9     | 28.00      | 0.017             | 0.95         |
| C9      | N9     | N10    | 3.00       | 0.017             | 0.95         |
| C10     | N10    | N11    | 17.00      | 0.017             | 0.95         |
| C11     | N11    | N12    | 17.00      | 0.017             | 0.95         |
| C12     | N12    | N13    | 5.00       | 0.017             | 0.95         |
| C13     | N13    | N14    | 12.00      | 0.017             | 0.95         |
| C14     | N14    | N15    | 25.50      | 0.017             | 0.95         |
| C15     | N15    | N16    | 2.00       | 0.017             | 0.95         |
| C16     | N16    | N17    | 15.00      | 0.017             | 0.95         |
| C17     | N17    | N18    | 34.50      | 0.017             | 0.95         |
| C18     | N18    | N19    | 5.00       | 0.017             | 0.95         |
| C19     | N19    | N20    | 7.00       | 0.017             | 0.95         |
| C21     | N21    | N22    | 15.00      | 0.017             | 2.39         |
| C22     | N22    | N23    | 4.00       | 0.017             | 1.06         |
| C23     | N23    | N24    | 58.00      | 0.017             | 1.06         |
| C24     | N24    | N25    | 47.50      | 0.017             | 1.06         |

---

|     |     |     |       |        |      |
|-----|-----|-----|-------|--------|------|
| C25 | N25 | N26 | 33.00 | 0.017  | 1.06 |
| C26 | N26 | N27 | 47.00 | 0.017  | 1.06 |
| C27 | N27 | N28 | 54.50 | 0.017  | 1.06 |
| C28 | N28 | N29 | 52.50 | 0.017  | 1.06 |
| C29 | N29 | N30 | 29.50 | 0.017  | 1.06 |
| C30 | N30 | N31 | 24.00 | 0.017  | 1.06 |
| C31 | N31 | N32 | 20.00 | 0.017  | 1.06 |
| C32 | N32 | N33 | 53.00 | 0.017  | 1.11 |
| C33 | N33 | N34 | 40.50 | 0.017  | 1.11 |
| C34 | N34 | N35 | 40.50 | 0.017  | 1.11 |
| C35 | N35 | N36 | 33.50 | 0.017  | 1.11 |
| C36 | N36 | N37 | 26.00 | 0.017  | 1.11 |
| C37 | N37 | N38 | 30.00 | 0.017  | 1.11 |
| C38 | N38 | N39 | 42.00 | 0.017  | 1.06 |
| C39 | N39 | N40 | 36.00 | 0.017  | 1.06 |
| C41 | N20 | N41 | 15.00 | 0.017  | 0.95 |
| C42 | N41 | N21 | 28.00 | 0.017  | 0.95 |
| C45 | N38 | N43 | 32.50 | 0.017  | 0.84 |
| C46 | N43 | N44 | 30.00 | 0.017  | 0.84 |
| C58 | N45 | N46 | 40.10 | 0.0143 | 0.5  |
| C59 | N46 | N47 | 23.51 | 0.0143 | 0.5  |
| C60 | N47 | N48 | 21.94 | 0.0143 | 0.5  |
| C61 | N48 | N49 | 25.40 | 0.0143 | 0.5  |
| C62 | N49 | N50 | 25.30 | 0.0143 | 0.5  |
| C63 | N50 | N51 | 28.87 | 0.0143 | 0.5  |
| C64 | N51 | N52 | 25.40 | 0.0143 | 0.5  |
| C65 | N52 | N53 | 31.30 | 0.0143 | 0.5  |
| C66 | N53 | N54 | 37.87 | 0.0143 | 0.5  |
| C67 | N54 | N55 | 12.31 | 0.0143 | 0.5  |
| C68 | N55 | N56 | 29.85 | 0.0143 | 0.5  |
| C69 | N56 | N57 | 9.54  | 0.0143 | 0.5  |
| C70 | N58 | N59 | 28.50 | 0.0143 | 0.5  |
| C71 | N59 | N60 | 29.90 | 0.0143 | 0.5  |
| C72 | N60 | N61 | 25.50 | 0.0143 | 0.5  |
| C73 | N61 | N62 | 25.60 | 0.0143 | 0.5  |
| C74 | N62 | N63 | 25.27 | 0.0143 | 0.5  |
| C75 | N63 | N64 | 25.11 | 0.0143 | 0.5  |
| C76 | N64 | N65 | 21.62 | 0.0143 | 0.5  |
| C77 | N65 | N66 | 28.50 | 0.0143 | 0.5  |
| C78 | N66 | N67 | 26.00 | 0.0143 | 0.5  |
| C79 | N67 | N68 | 29.50 | 0.0143 | 0.5  |
| C80 | N68 | N69 | 8.21  | 0.0143 | 0.5  |
| C81 | N70 | N71 | 48.00 | 0.017  | 0.7  |
| C82 | N71 | N69 | 11.00 | 0.017  | 0.7  |
| C83 | N69 | N57 | 3.00  | 0.017  | 0.7  |
| C84 | N57 | N72 | 8.00  | 0.017  | 0.7  |
| C85 | N72 | N73 | 26.00 | 0.017  | 0.7  |
| C86 | N73 | N5  | 27.00 | 0.017  | 0.7  |

---

**Table S3.** Land uses in the study area of Balloon network.

| Land Uses         | Percentage |
|-------------------|------------|
| Streets and roads | 28.97%     |
| General trading   | 18.91%     |
| Green zones       | 10.10%     |
| Education         | 7.87%      |
| Restaurants       | 7.56%      |
| Hotels            | 7.50%      |
| Offices           | 6.71%      |
| Car parks         | 3.47%      |
| Churches          | 2.27%      |
| Museums           | 1.75%      |
| Health            | 1.70%      |
| Warehouses        | 1.68%      |
| Dwellings         | 1.51%      |

## 2. Case Study Data of ES-N Network

ES-N network is presented in the Figure S3 below.

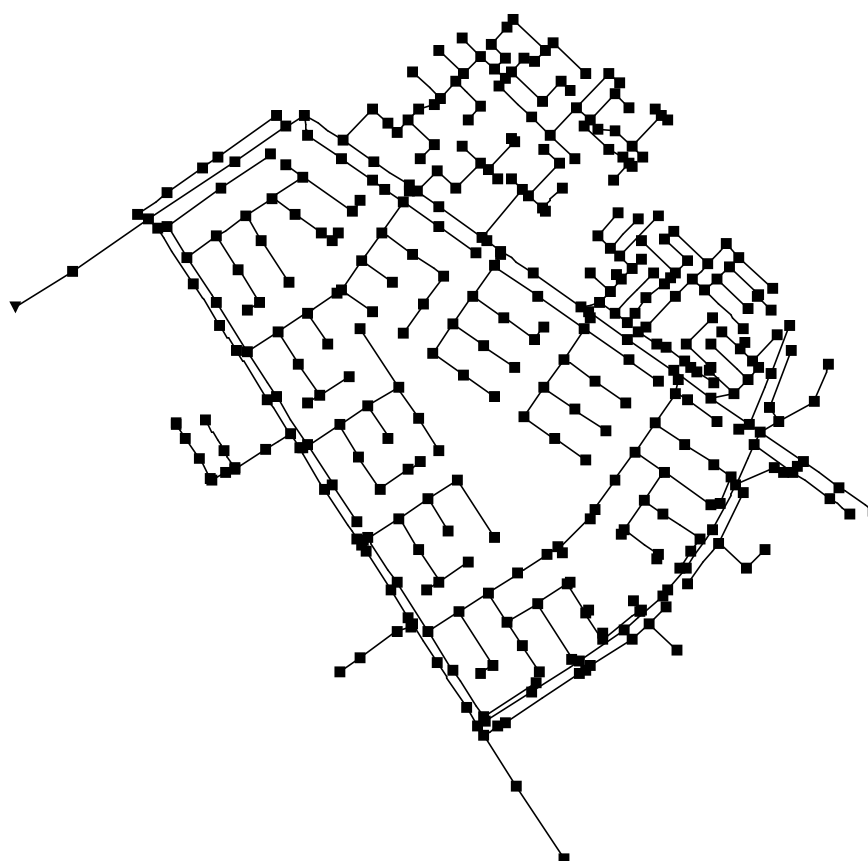**Figure S2.** Representation of ES-N drainage network.

Table S4. Data for nodes and subcatchments in the ES-N network

| Node ID | Invert Elevation [m] | Max. Depth [m] | Flooding Area [m <sup>2</sup> ] | Sub-catchment Area [ha] | Impervious Area [%] | Width [m] | Slope [%] |
|---------|----------------------|----------------|---------------------------------|-------------------------|---------------------|-----------|-----------|
| N01     | 2548.39              | 2.88           | 246.781                         | 0.247                   | 66.35               | 12.65     | 13.62     |
| N02     | 2548.62              | 2.88           | 160.024                         | 0.160                   | 63.51               | 9.64      | 22.36     |
| N03     | 2548.37              | 3.11           | 135.007                         | 0.135                   | 64.31               | 9.14      | 42.04     |
| N04     | 2548.45              | 3.16           | 297.522                         | 0.298                   | 66.40               | 13.76     | 6.95      |
| N05     | 2548.46              | 3.13           | 230.249                         | 0.230                   | 73.61               | 11.50     | 8.92      |
| N06     | 2548.58              | 3.68           | 33.968                          | 0.034                   | 62.20               | 3.97      | 24.24     |
| N07     | 2550.52              | 1.40           | 61.524                          | 0.062                   | 95.00               | 6.09      | 5.20      |
| N08     | 2550.04              | 1.68           | 159.264                         | 0.159                   | 74.17               | 8.22      | 16.39     |
| N09     | 2550.66              | 1.17           | 154.231                         | 0.154                   | 60.08               | 10.17     | 28.92     |
| N10     | 2550.53              | 1.13           | 242.409                         | 0.242                   | 81.09               | 12.98     | 22.33     |
| N11     | 2550.15              | 1.56           | 107.297                         | 0.107                   | 94.79               | 8.11      | 28.95     |
| N12     | 2550.08              | 1.77           | 91.358                          | 0.091                   | 95.00               | 7.74      | 30.01     |
| N13     | 2550.39              | 1.06           | 130.938                         | 0.131                   | 91.95               | 8.96      | 28.23     |
| N14     | 2550.78              | 1.18           | 613.615                         | 0.614                   | 38.25               | 19.03     | 14.80     |
| N15     | 2550.55              | 1.24           | 268.469                         | 0.268                   | 79.51               | 13.33     | 21.98     |
| N16     | 2550.89              | 1.22           | 592.549                         | 0.593                   | 38.78               | 17.58     | 27.97     |
| N17     | 2550.58              | 1.26           | 600.461                         | 0.600                   | 84.67               | 17.75     | 26.48     |
| N18     | 2550.78              | 1.32           | 785.106                         | 0.785                   | 93.46               | 22.49     | 24.55     |
| N19     | 2550.73              | 1.42           | 102.452                         | 0.102                   | 95.00               | 8.04      | 7.74      |
| N20     | 2550.52              | 1.07           | 242.729                         | 0.243                   | 84.07               | 12.31     | 23.18     |
| N21     | 2550.32              | 1.57           | 160.807                         | 0.161                   | 74.79               | 10.13     | 30.04     |
| N22     | 2550.26              | 1.79           | 420.711                         | 0.421                   | 72.47               | 16.92     | 38.38     |
| N23     | 2550.31              | 1.36           | 444.963                         | 0.445                   | 88.55               | 17.26     | 20.24     |
| N24     | 2550.8               | 1.08           | 269.901                         | 0.270                   | 84.44               | 13.11     | 48.78     |
| N25     | 2550.48              | 1.16           | 216.588                         | 0.217                   | 95.00               | 11.15     | 19.73     |
| N26     | 2550.76              | 1.65           | 358.412                         | 0.358                   | 87.78               | 15.37     | 21.98     |
| N27     | 2550.81              | 1.13           | 360.815                         | 0.361                   | 66.39               | 12.36     | 22.15     |
| N28     | 2550.331             | 1.53           | 228.442                         | 0.228                   | 93.87               | 11.56     | 15.56     |
| N29     | 2550.53              | 1.44           | 59.652                          | 0.060                   | 95.00               | 6.22      | 6.12      |
| N30     | 2550.46              | 1.62           | 420.119                         | 0.420                   | 64.07               | 16.17     | 64.44     |
| N31     | 2550.69              | 1.57           | 111.507                         | 0.112                   | 94.77               | 7.86      | 7.74      |
| N32     | 2550.7               | 1.08           | 224.679                         | 0.225                   | 88.53               | 10.67     | 27.11     |
| N33     | 2550.51              | 1.31           | 383.231                         | 0.383                   | 95.00               | 15.49     | 26.40     |
| N34     | 2550.56              | 1.17           | 96.567                          | 0.097                   | 81.40               | 7.35      | 27.30     |
| N35     | 2550.6               | 1.67           | 119.227                         | 0.119                   | 83.98               | 7.90      | 7.74      |
| N36     | 2550.53              | 1.11           | 211.952                         | 0.212                   | 82.10               | 11.00     | 7.88      |
| N37     | 2550.49              | 1.51           | 313.360                         | 0.313                   | 67.90               | 13.17     | 29.10     |
| N38     | 2550.45              | 1.50           | 173.905                         | 0.174                   | 67.96               | 10.95     | 28.13     |
| N39     | 2550.32              | 1.12           | 251.830                         | 0.252                   | 84.30               | 12.57     | 21.17     |
| N40     | 2550.4               | 1.09           | 677.749                         | 0.678                   | 90.00               | 21.44     | 28.41     |
| N41     | 2549.61              | 2.48           | 1150.493                        | 1.150                   | 78.25               | 26.79     | 48.79     |
| N42     | 2550.77              | 1.20           | 521.814                         | 0.522                   | 60.45               | 18.00     | 12.15     |
| N43     | 2550.35              | 1.40           | 399.784                         | 0.400                   | 74.51               | 15.97     | 40.50     |
| N44     | 2550.34              | 1.15           | 242.847                         | 0.243                   | 84.90               | 12.38     | 27.14     |
| N45     | 2550.48              | 1.26           | 401.502                         | 0.402                   | 75.87               | 15.89     | 35.47     |
| N46     | 2550.61              | 1.05           | 116.357                         | 0.116                   | 83.05               | 8.21      | 27.77     |
| N47     | 2550.33              | 1.25           | 463.279                         | 0.463                   | 95.00               | 17.33     | 25.62     |

---

|     |         |      |          |       |       |       |       |
|-----|---------|------|----------|-------|-------|-------|-------|
| N48 | 2550.75 | 1.29 | 383.874  | 0.384 | 95.00 | 15.52 | 22.90 |
| N49 | 2550.75 | 1.19 | 405.799  | 0.406 | 74.00 | 12.76 | 11.36 |
| N50 | 2550.72 | 1.65 | 265.258  | 0.265 | 59.34 | 12.43 | 7.77  |
| N51 | 2550.65 | 1.31 | 831.206  | 0.831 | 62.13 | 18.45 | 17.57 |
| N52 | 2550.6  | 1.33 | 174.195  | 0.174 | 74.12 | 10.08 | 22.77 |
| N53 | 2550.46 | 1.25 | 154.851  | 0.155 | 90.16 | 9.87  | 23.16 |
| N54 | 2549.8  | 1.38 | 367.278  | 0.367 | 73.25 | 14.04 | 21.67 |
| N55 | 2551.01 | 1.10 | 250.814  | 0.251 | 95.00 | 12.64 | 7.74  |
| N56 | 2550.12 | 1.37 | 175.403  | 0.175 | 78.85 | 7.91  | 20.21 |
| N57 | 2550.42 | 1.38 | 958.174  | 0.958 | 44.01 | 25.42 | 11.95 |
| N58 | 2549.68 | 1.52 | 325.573  | 0.326 | 52.86 | 13.62 | 9.64  |
| N59 | 2550.45 | 1.24 | 553.564  | 0.554 | 52.71 | 19.63 | 43.17 |
| N60 | 2550.55 | 1.18 | 313.549  | 0.314 | 85.16 | 13.22 | 19.73 |
| N61 | 2550.37 | 1.60 | 138.940  | 0.139 | 75.21 | 8.97  | 28.23 |
| N62 | 2549.99 | 1.78 | 302.950  | 0.303 | 88.93 | 14.07 | 38.80 |
| N63 | 2550.66 | 1.24 | 469.721  | 0.470 | 53.75 | 17.36 | 43.89 |
| N64 | 2550.43 | 1.14 | 319.957  | 0.320 | 93.22 | 13.73 | 24.61 |
| N65 | 2550.14 | 1.23 | 1208.309 | 1.208 | 83.33 | 27.08 | 24.44 |
| N66 | 2550.42 | 1.22 | 287.512  | 0.288 | 95.00 | 13.61 | 17.94 |
| N67 | 2550.58 | 1.14 | 238.522  | 0.239 | 95.00 | 11.15 | 18.35 |
| N68 | 2550.48 | 1.22 | 389.188  | 0.389 | 95.00 | 15.78 | 11.99 |
| N69 | 2550.44 | 1.45 | 182.890  | 0.183 | 81.46 | 10.55 | 28.23 |
| N70 | 2550.6  | 1.16 | 251.151  | 0.251 | 95.00 | 12.66 | 28.23 |
| N71 | 2549.05 | 1.67 | 350.446  | 0.350 | 76.78 | 14.11 | 26.33 |
| N72 | 2550.2  | 1.24 | 243.593  | 0.244 | 84.35 | 12.71 | 6.60  |
| N73 | 2550.49 | 1.24 | 537.171  | 0.537 | 43.07 | 18.04 | 13.89 |
| N74 | 2551    | 1.20 | 184.103  | 0.184 | 95.00 | 9.43  | 21.98 |
| N75 | 2551    | 1.14 | 291.253  | 0.291 | 95.00 | 14.06 | 21.97 |
| N76 | 2550.8  | 1.24 | 204.840  | 0.205 | 95.00 | 11.38 | 7.74  |
| N77 | 2550.46 | 1.06 | 279.342  | 0.279 | 85.73 | 11.28 | 15.98 |
| N78 | 2549.78 | 1.64 | 2101.489 | 2.101 | 70.29 | 36.60 | 33.14 |
| N79 | 2550.38 | 1.37 | 199.247  | 0.199 | 92.80 | 10.18 | 45.67 |
| N80 | 2549.84 | 1.40 | 1719.522 | 1.720 | 78.78 | 31.51 | 9.42  |
| N81 | 2550.06 | 1.72 | 416.335  | 0.416 | 95.00 | 16.33 | 33.41 |
| N82 | 2547.49 | 4.00 | 123.223  | 0.123 | 34.93 | 6.66  | 71.36 |
| N83 | 2549.1  | 2.80 | 463.043  | 0.463 | 20.00 | 16.03 | 73.21 |
| N84 | 2550.44 | 1.56 | 240.372  | 0.240 | 61.79 | 10.71 | 23.75 |
| N85 | 2550.27 | 1.42 | 212.049  | 0.212 | 79.96 | 11.80 | 22.30 |
| N86 | 2549.87 | 1.63 | 505.415  | 0.505 | 86.22 | 15.57 | 19.70 |
| N87 | 2550.01 | 1.80 | 55.934   | 0.056 | 62.53 | 5.21  | 22.33 |
| N88 | 2549.97 | 2.30 | 68.080   | 0.068 | 71.60 | 6.13  | 22.33 |
| N89 | 2549.87 | 2.02 | 132.243  | 0.132 | 80.26 | 7.74  | 22.62 |
| N90 | 2549.8  | 2.08 | 144.374  | 0.144 | 73.37 | 8.52  | 22.33 |
| N91 | 2549.36 | 2.19 | 64.761   | 0.065 | 80.40 | 5.97  | 22.33 |
| N92 | 2550.33 | 1.60 | 239.371  | 0.239 | 74.74 | 11.52 | 21.98 |
| N93 | 2550.19 | 1.41 | 321.830  | 0.322 | 38.02 | 12.99 | 9.94  |
| N94 | 2550.13 | 1.69 | 889.835  | 0.890 | 87.28 | 22.59 | 15.73 |
| N95 | 2550.33 | 1.68 | 402.952  | 0.403 | 95.00 | 16.64 | 18.85 |
| N96 | 2549.5  | 1.26 | 171.545  | 0.172 | 73.95 | 9.89  | 36.85 |
| N97 | 2549.73 | 1.86 | 141.528  | 0.142 | 77.20 | 7.81  | 11.66 |
| N98 | 2550.99 | 1.28 | 221.933  | 0.222 | 73.04 | 11.22 | 49.94 |

---

|      |         |      |          |       |       |       |        |
|------|---------|------|----------|-------|-------|-------|--------|
| N99  | 2550.57 | 1.47 | 149.915  | 0.150 | 95.00 | 9.49  | 28.38  |
| N100 | 2550.1  | 1.70 | 80.255   | 0.080 | 63.26 | 6.64  | 22.33  |
| N101 | 2550.75 | 1.45 | 333.194  | 0.333 | 75.48 | 12.91 | 118.37 |
| N102 | 2551.12 | 1.30 | 960.146  | 0.960 | 79.43 | 23.88 | 41.84  |
| N103 | 2550.02 | 1.69 | 258.240  | 0.258 | 93.91 | 12.96 | 18.59  |
| N104 | 2551.13 | 1.07 | 478.429  | 0.478 | 64.60 | 16.70 | 43.61  |
| N105 | 2549.11 | 2.03 | 195.975  | 0.196 | 73.81 | 9.92  | 30.92  |
| N106 | 2550.11 | 1.33 | 232.099  | 0.232 | 95.00 | 10.85 | 38.66  |
| N107 | 2549.54 | 1.90 | 231.765  | 0.232 | 95.00 | 12.14 | 30.66  |
| N108 | 2548.98 | 1.99 | 177.155  | 0.177 | 78.04 | 9.50  | 41.00  |
| N109 | 2550.58 | 1.48 | 181.478  | 0.181 | 94.04 | 9.39  | 7.73   |
| N110 | 2549.43 | 1.97 | 33.642   | 0.034 | 67.51 | 3.93  | 42.03  |
| N111 | 2550.46 | 1.34 | 125.364  | 0.125 | 95.00 | 7.82  | 5.20   |
| N112 | 2550.7  | 1.09 | 309.201  | 0.309 | 76.20 | 13.74 | 12.22  |
| N113 | 2550.96 | 0.90 | 397.359  | 0.397 | 90.54 | 16.78 | 5.70   |
| N114 | 2550.99 | 1.13 | 402.596  | 0.403 | 83.82 | 16.46 | 6.79   |
| N115 | 2549.65 | 1.60 | 1008.510 | 1.009 | 70.61 | 22.67 | 18.70  |
| N116 | 2548.47 | 3.21 | 450.084  | 0.450 | 74.09 | 15.54 | 19.98  |
| N117 | 2548.46 | 2.85 | 97.691   | 0.098 | 81.31 | 5.29  | 14.14  |
| N118 | 2548.97 | 1.75 | 12.424   | 0.012 | 70.29 | 2.33  | 29.45  |
| N119 | 2549.31 | 1.86 | 74.128   | 0.074 | 58.48 | 5.10  | 11.17  |
| N120 | 2549.78 | 2.23 | 140.620  | 0.141 | 89.79 | 6.62  | 8.62   |
| N121 | 2549.93 | 1.74 | 559.450  | 0.559 | 61.97 | 18.32 | 8.62   |
| N122 | 2549.93 | 1.86 | 191.462  | 0.191 | 90.00 | 8.64  | 10.63  |
| N123 | 2550    | 1.45 | 386.795  | 0.387 | 90.00 | 14.18 | 19.91  |
| N124 | 2550.15 | 1.38 | 331.779  | 0.332 | 90.00 | 12.76 | 29.03  |
| N125 | 2550.42 | 0.79 | 192.705  | 0.193 | 90.00 | 8.43  | 22.86  |
| N126 | 2550.45 | 0.77 | 547.325  | 0.547 | 78.05 | 16.97 | 25.26  |
| N127 | 2548.16 | 3.94 | 427.281  | 0.427 | 75.76 | 15.71 | 40.92  |
| N128 | 2549.89 | 1.78 | 690.497  | 0.690 | 62.18 | 19.54 | 82.21  |
| N129 | 2550.23 | 1.95 | 79.774   | 0.080 | 57.50 | 4.60  | 24.59  |
| N130 | 2549.46 | 1.27 | 156.732  | 0.157 | 73.31 | 9.39  | 55.61  |
| N131 | 2549.84 | 1.73 | 380.734  | 0.381 | 95.00 | 15.95 | 18.21  |
| N132 | 2550.31 | 1.58 | 427.164  | 0.427 | 84.37 | 16.49 | 34.48  |
| N133 | 2547.69 | 3.96 | 157.641  | 0.158 | 37.04 | 9.67  | 20.32  |
| N134 | 2549.18 | 1.55 | 272.943  | 0.273 | 76.90 | 13.44 | 44.68  |
| N135 | 2550.15 | 1.52 | 77.342   | 1.835 | 51.01 | 34.86 | 60.84  |
| N136 | 2550.4  | 1.40 | 107.747  | 0.077 | 89.35 | 6.94  | 28.23  |
| N137 | 2550.14 | 1.33 | 272.309  | 0.108 | 72.96 | 7.33  | 19.74  |
| N138 | 2550.5  | 1.42 | 212.800  | 0.272 | 86.83 | 12.82 | 27.14  |
| N139 | 2548.6  | 4.05 | 86.450   | 0.213 | 73.52 | 11.69 | 24.18  |
| N140 | 2549.99 | 1.56 | 557.915  | 0.086 | 60.03 | 7.31  | 22.33  |
| N141 | 2550.09 | 1.79 | 242.322  | 0.558 | 64.78 | 18.93 | 29.64  |
| N142 | 2548.67 | 3.45 | 117.202  | 0.242 | 77.88 | 12.49 | 21.98  |
| N143 | 2550.21 | 1.86 | 516.425  | 0.117 | 71.88 | 8.36  | 21.98  |
| N144 | 2550.55 | 1.44 | 372.857  | 0.516 | 80.23 | 17.77 | 27.10  |
| N145 | 2550    | 2.00 | 87.641   | 0.373 | 87.74 | 15.29 | 22.07  |
| N146 | 2550.24 | 1.76 | 306.504  | 0.088 | 95.00 | 5.88  | 21.98  |
| N147 | 2549.07 | 1.73 | 152.260  | 0.307 | 95.00 | 13.82 | 22.08  |
| N148 | 2550.05 | 1.65 | 75.048   | 0.152 | 92.41 | 9.62  | 36.00  |
| N149 | 2549    | 2.30 | 568.374  | 0.075 | 95.00 | 6.16  | 10.73  |



---

|      |         |      |         |       |       |       |        |
|------|---------|------|---------|-------|-------|-------|--------|
| N150 | 2550.35 | 1.74 | 454.125 | 0.568 | 58.04 | 18.65 | 12.53  |
| N151 | 2550.28 | 0.55 | 382.326 | 0.454 | 60.73 | 15.59 | 8.99   |
| N152 | 2550.38 | 1.49 | 692.415 | 0.382 | 95.00 | 15.47 | 20.70  |
| N153 | 2550.29 | 1.35 | 551.169 | 0.692 | 33.24 | 19.93 | 14.91  |
| N154 | 2549.02 | 2.80 | 385.196 | 0.551 | 67.02 | 18.58 | 16.76  |
| N155 | 2548.97 | 2.80 | 873.015 | 0.385 | 20.08 | 15.33 | 102.93 |
| N156 | 2548.78 | 1.74 | 538.060 | 0.873 | 24.83 | 22.65 | 109.34 |
| N157 | 2550.14 | 1.69 | 141.045 | 0.538 | 71.71 | 15.23 | 58.50  |
| N158 | 2549.71 | 1.75 | 109.561 | 0.141 | 71.50 | 9.07  | 19.89  |
| N159 | 2550.3  | 1.42 | 256.446 | 0.110 | 95.00 | 8.61  | 28.23  |
| N160 | 2549.65 | 2.05 | 258.189 | 0.256 | 50.00 | 11.31 | 16.87  |
| N161 | 2548.57 | 3.48 | 249.988 | 0.258 | 89.07 | 13.84 | 28.23  |
| N162 | 2549.61 | 2.07 | 101.871 | 0.250 | 65.65 | 13.16 | 60.25  |
| N163 | 2549.74 | 1.74 | 75.841  | 0.102 | 66.74 | 7.87  | 28.51  |
| N164 | 2550.08 | 1.74 | 379.742 | 0.076 | 62.43 | 6.04  | 23.10  |
| N165 | 2550.01 | 1.38 | 374.252 | 0.380 | 95.00 | 15.66 | 53.50  |
| N166 | 2549.65 | 1.96 | 549.597 | 0.374 | 78.37 | 15.31 | 6.60   |
| N167 | 2550.89 | 1.43 | 171.322 | 0.550 | 90.00 | 17.10 | 11.69  |
| N168 | 2548.99 | 2.80 | 572.826 | 0.171 | 91.47 | 9.39  | 21.98  |
| N169 | 2549.96 | 1.63 | 920.693 | 0.573 | 25.06 | 18.91 | 109.31 |
| N170 | 2549.81 | 2.44 | 174.735 | 0.921 | 75.28 | 24.02 | 27.41  |
| N171 | 2550.13 | 1.36 | 306.667 | 0.175 | 72.10 | 10.10 | 21.98  |
| N172 | 2549.93 | 1.43 | 410.036 | 0.307 | 90.00 | 13.96 | 11.16  |
| N173 | 2550.07 | 1.44 | 399.768 | 0.410 | 95.00 | 16.28 | 30.67  |
| N174 | 2549.67 | 1.67 | 379.218 | 0.400 | 95.00 | 16.31 | 35.20  |
| N175 | 2550.5  | 1.50 | 302.822 | 0.379 | 95.00 | 15.63 | 38.52  |
| N176 | 2550.51 | 1.27 | 385.083 | 0.303 | 80.31 | 12.99 | 11.84  |
| N177 | 2549.79 | 2.40 | 210.855 | 0.385 | 90.92 | 16.01 | 21.98  |
| N178 | 2548.42 | 2.62 | 711.111 | 0.211 | 84.11 | 11.32 | 21.98  |
| N179 | 2550.17 | 1.83 | 169.494 | 0.711 | 73.18 | 20.61 | 12.05  |
| N180 | 2550.19 | 1.55 | 264.874 | 0.169 | 95.00 | 8.75  | 21.75  |
| N181 | 2550.36 | 1.63 | 147.584 | 0.265 | 95.00 | 13.29 | 15.86  |
| N182 | 2550.32 | 1.47 | 181.356 | 0.148 | 95.00 | 9.24  | 5.20   |
| N183 | 2548.66 | 2.66 | 616.116 | 0.181 | 91.63 | 9.70  | 5.52   |
| N184 | 2550.13 | 1.41 | 397.107 | 0.616 | 75.75 | 17.40 | 15.67  |
| N185 | 2550.2  | 1.89 | 80.549  | 0.397 | 95.00 | 15.89 | 22.15  |
| N186 | 2550.74 | 1.18 | 382.118 | 0.081 | 59.65 | 6.33  | 22.33  |
| N187 | 2550.51 | 1.34 | 556.008 | 0.382 | 92.58 | 15.47 | 16.54  |
| N188 | 2550.17 | 1.56 | 120.807 | 0.556 | 46.23 | 18.41 | 14.66  |
| N189 | 2548.44 | 2.60 | 355.912 | 0.121 | 82.14 | 4.38  | 12.42  |
| N190 | 2550    | 1.85 | 207.040 | 0.356 | 79.81 | 14.11 | 11.75  |
| N191 | 2548.64 | 2.98 | 50.373  | 0.207 | 95.00 | 11.06 | 17.71  |
| N192 | 2549.9  | 1.50 | 677.797 | 0.050 | 74.58 | 4.77  | 17.12  |
| N193 | 2549.85 | 1.45 | 133.885 | 0.678 | 85.73 | 17.60 | 20.07  |
| N194 | 2550.43 | 1.41 | 320.750 | 0.134 | 90.58 | 8.94  | 15.20  |
| N195 | 2549.65 | 1.43 | 355.718 | 0.321 | 82.03 | 14.28 | 22.33  |
| N196 | 2549.97 | 1.81 | 77.096  | 0.356 | 75.77 | 14.34 | 38.54  |
| N197 | 2550.41 | 1.14 | 125.153 | 0.077 | 83.43 | 6.54  | 22.85  |
| N198 | 2550.07 | 2.05 | 34.601  | 0.125 | 92.37 | 9.01  | 22.73  |
| N199 | 2550.36 | 1.46 | 425.959 | 0.035 | 57.50 | 3.90  | 22.33  |
| N200 | 2550.23 | 1.70 | 574.094 | 0.426 | 95.00 | 16.67 | 28.05  |

---

|      |          |      |          |       |       |       |       |
|------|----------|------|----------|-------|-------|-------|-------|
| N201 | 2549.71  | 2.40 | 295.426  | 0.574 | 60.88 | 17.10 | 11.75 |
| N202 | 2549.44  | 1.91 | 407.496  | 0.295 | 76.07 | 13.75 | 22.00 |
| N203 | 2550.3   | 1.38 | 233.422  | 0.407 | 72.57 | 16.32 | 54.76 |
| N204 | 2550.09  | 1.23 | 339.100  | 0.233 | 28.03 | 12.11 | 7.77  |
| N205 | 2550.12  | 1.78 | 100.100  | 0.339 | 83.26 | 14.26 | 25.20 |
| N206 | 2548.47  | 3.45 | 521.721  | 0.100 | 95.00 | 7.53  | 30.05 |
| N207 | 2550.16  | 1.50 | 273.484  | 0.522 | 75.99 | 17.94 | 37.38 |
| N208 | 2550.53  | 1.46 | 83.136   | 0.273 | 52.26 | 11.88 | 32.35 |
| N209 | 2548.89  | 1.45 | 312.254  | 0.083 | 57.50 | 6.07  | 23.38 |
| N210 | 2549.61  | 1.64 | 383.442  | 0.312 | 72.76 | 12.55 | 28.38 |
| N211 | 2550.53  | 1.30 | 267.530  | 0.383 | 94.65 | 15.73 | 26.21 |
| N212 | 2550.34  | 1.34 | 462.147  | 0.268 | 95.00 | 12.69 | 18.34 |
| N213 | 2550.15  | 2.02 | 118.647  | 0.462 | 43.90 | 16.92 | 28.12 |
| N214 | 2550.09  | 2.13 | 164.566  | 0.119 | 79.12 | 8.46  | 22.33 |
| N215 | 2549.23  | 1.43 | 253.300  | 0.165 | 72.84 | 10.01 | 22.31 |
| N216 | 2548.7   | 3.30 | 115.755  | 0.253 | 84.92 | 11.84 | 21.20 |
| N217 | 2550.02  | 1.20 | 388.098  | 0.116 | 69.66 | 7.78  | 21.98 |
| N218 | 2550.65  | 1.30 | 825.890  | 0.388 | 95.00 | 15.83 | 30.59 |
| N219 | 2550.02  | 1.88 | 374.104  | 0.826 | 31.11 | 21.98 | 19.22 |
| N220 | 2550.18  | 1.94 | 166.587  | 0.374 | 95.00 | 15.36 | 22.03 |
| N221 | 2550.271 | 1.51 | 403.570  | 0.167 | 69.59 | 8.39  | 26.81 |
| N222 | 2550.18  | 1.55 | 329.189  | 0.404 | 63.30 | 14.51 | 12.07 |
| N223 | 2550.56  | 1.54 | 646.034  | 0.329 | 92.73 | 13.09 | 12.15 |
| N224 | 2550     | 1.65 | 407.836  | 0.646 | 72.11 | 19.25 | 21.19 |
| N225 | 2549.25  | 1.42 | 251.872  | 0.408 | 95.00 | 16.14 | 12.19 |
| N226 | 2549.69  | 1.61 | 32.961   | 0.252 | 80.73 | 12.16 | 30.24 |
| N227 | 2549.25  | 2.35 | 2253.393 | 0.033 | 95.00 | 4.15  | 13.34 |
| N228 | 2550.56  | 1.44 | 185.991  | 2.253 | 64.17 | 35.44 | 13.99 |
| N229 | 2550.24  | 1.40 | 147.370  | 0.186 | 70.48 | 10.93 | 5.60  |
| N230 | 2550.06  | 1.60 | 251.282  | 0.147 | 95.00 | 9.02  | 30.86 |
| N231 | 2549.25  | 1.46 | 343.743  | 0.251 | 82.06 | 12.65 | 22.22 |
| N232 | 2548.28  | 3.04 | 298.315  | 0.344 | 83.87 | 15.11 | 56.24 |
| N233 | 2550.43  | 1.29 | 279.836  | 0.298 | 61.41 | 14.19 | 51.19 |
| N234 | 2549.41  | 1.86 | 98.610   | 0.280 | 95.00 | 12.26 | 11.16 |
| N235 | 2550.17  | 1.26 | 89.986   | 0.099 | 61.50 | 6.62  | 13.09 |
| N236 | 2550.34  | 1.37 | 403.034  | 0.090 | 81.26 | 7.07  | 28.23 |
| N237 | 2550.24  | 1.25 | 396.920  | 0.403 | 95.00 | 16.31 | 6.62  |
| N238 | 2549.8   | 1.97 | 124.361  | 0.397 | 95.00 | 15.74 | 27.11 |
| N239 | 2549.99  | 1.81 | 183.244  | 0.124 | 66.62 | 8.68  | 28.65 |
| N240 | 2549.38  | 2.13 | 149.158  | 0.183 | 90.15 | 10.81 | 28.23 |
| N241 | 2548.24  | 3.32 | 443.846  | 0.149 | 84.98 | 9.75  | 25.44 |
| N242 | 2550.26  | 1.78 | 109.076  | 0.444 | 76.21 | 14.44 | 29.13 |
| N243 | 2549.77  | 1.76 | 382.911  | 0.109 | 71.72 | 7.43  | 22.54 |
| N244 | 2550.08  | 1.92 | 378.598  | 0.383 | 80.16 | 15.10 | 11.33 |
| N245 | 2549.99  | 1.46 | 374.245  | 0.379 | 77.12 | 15.51 | 21.98 |
| N246 | 2550.08  | 1.40 | 476.201  | 0.374 | 95.00 | 15.54 | 20.48 |
| N247 | 2550.06  | 1.39 | 419.077  | 0.476 | 95.00 | 17.59 | 11.92 |
| N248 | 2549.74  | 1.90 | 452.566  | 0.419 | 95.00 | 16.69 | 31.21 |
| N249 | 2549.47  | 1.90 | 475.746  | 0.453 | 95.00 | 17.17 | 16.42 |
| N250 | 2549.96  | 1.27 | 361.942  | 0.476 | 95.00 | 18.05 | 12.63 |
| N251 | 2549.81  | 1.57 | 347.755  | 0.362 | 95.00 | 13.97 | 16.24 |

---

|      |         |      |         |       |       |       |       |
|------|---------|------|---------|-------|-------|-------|-------|
| N252 | 2548.72 | 2.36 | 572.722 | 0.348 | 73.31 | 12.39 | 15.73 |
| N253 | 2549.51 | 1.74 | 468.333 | 0.573 | 71.49 | 18.48 | 13.70 |
| N254 | 2549.66 | 1.85 | 229.876 | 0.468 | 88.22 | 15.93 | 21.11 |
| N255 | 2548.61 | 3.60 | 141.695 | 0.230 | 88.80 | 12.29 | 13.68 |
| N256 | 2549.59 | 1.65 | 379.040 | 0.142 | 59.60 | 9.21  | 22.31 |
| N257 | 2547.62 | 3.90 | 368.467 | 0.379 | 95.00 | 15.67 | 22.16 |
| N258 | 2550.17 | 1.38 | 386.560 | 0.368 | 39.86 | 13.87 | 23.89 |
| N259 | 2548.39 | 3.38 | 123.313 | 0.387 | 95.00 | 16.10 | 7.85  |
| N260 | 2548.41 | 3.29 | 226.278 | 0.123 | 64.46 | 8.59  | 39.01 |
| N261 | 2550.27 | 1.35 | 181.336 | 0.226 | 64.75 | 10.86 | 19.57 |
| N262 | 2549.94 | 1.37 | 440.349 | 0.181 | 83.85 | 10.50 | 26.76 |
| N263 | 2550.06 | 1.18 | 154.416 | 0.440 | 95.00 | 17.49 | 39.84 |
| N264 | 2549.89 | 1.58 | 162.087 | 0.154 | 79.11 | 9.65  | 28.23 |
| N265 | 2549.81 | 1.84 | 140.409 | 0.162 | 95.00 | 9.61  | 28.23 |
| N266 | 2549.85 | 1.57 | 384.492 | 0.140 | 70.84 | 9.09  | 25.14 |
| N267 | 2550.29 | 1.37 | 418.430 | 0.384 | 84.55 | 15.52 | 25.14 |
| N268 | 2548.59 | 4.12 | 175.521 | 0.418 | 95.00 | 16.59 | 17.40 |
| N269 | 2549.1  | 3.10 | 482.603 | 0.176 | 62.20 | 9.95  | 22.33 |
| N270 | 2549.99 | 1.50 | 71.406  | 0.483 | 77.19 | 16.78 | 26.45 |
| N271 | 2550.13 | 1.82 | 434.004 | 0.071 | 90.00 | 6.18  | 12.29 |
| N272 | 2550.08 | 1.50 | 955.513 | 0.434 | 95.00 | 17.01 | 21.98 |
| N273 | 2549.66 | 1.48 | 309.132 | 0.956 | 38.78 | 25.46 | 12.17 |
| N274 | 2550.56 | 1.45 | 173.841 | 0.309 | 82.33 | 13.56 | 13.57 |
| N275 | 2548.54 | 3.18 | 512.508 | 0.174 | 95.00 | 9.86  | 13.48 |
| N276 | 2549.53 | 1.94 | 372.711 | 0.513 | 67.57 | 16.90 | 27.52 |
| N277 | 2549.66 | 1.92 | 396.055 | 0.373 | 95.00 | 15.28 | 12.19 |
| N278 | 2549.43 | 1.94 | 288.527 | 0.396 | 95.00 | 15.92 | 13.44 |
| N279 | 2549.45 | 2.53 | 72.553  | 0.289 | 80.10 | 12.54 | 17.12 |
| N280 | 2547.72 | 4.00 | 746.596 | 0.073 | 60.59 | 5.63  | 17.12 |
| N281 | 2549.05 | 2.80 | 341.598 | 0.747 | 41.53 | 21.68 | 79.35 |
| N282 | 2548.04 | 2.66 | 411.860 | 0.342 | 20.00 | 13.37 | 94.76 |
| N283 | 2548.58 | 2.05 | 288.249 | 0.412 | 78.92 | 14.46 | 82.98 |
| N284 | 2548.45 | 3.49 | 137.432 | 0.288 | 76.78 | 13.17 | 82.90 |
| N285 | 2550.03 | 1.50 | 407.072 | 0.137 | 68.61 | 7.90  | 6.60  |
| N286 | 2549.49 | 1.83 | 246.163 | 0.407 | 95.00 | 16.11 | 11.25 |
| N287 | 2549.86 | 1.76 | 92.772  | 0.246 | 87.83 | 12.63 | 12.53 |
| N288 | 2550.43 | 1.30 | 318.737 | 0.093 | 79.98 | 7.61  | 28.24 |
| N289 | 2550.03 | 1.60 | 382.072 | 0.319 | 70.93 | 14.01 | 29.54 |
| N290 | 2549.84 | 1.99 | 200.426 | 0.382 | 94.63 | 15.46 | 20.39 |
| N291 | 2550.14 | 1.28 | 268.877 | 0.200 | 71.76 | 11.47 | 22.18 |
| N292 | 2549.75 | 1.95 | 125.761 | 0.269 | 95.00 | 12.73 | 21.37 |
| N293 | 2550.37 | 1.88 | 108.204 | 0.126 | 86.75 | 8.56  | 22.33 |
| N294 | 2550.29 | 1.76 | 251.741 | 0.108 | 84.55 | 7.02  | 7.74  |
| N295 | 2550.03 | 1.35 | 452.069 | 0.252 | 91.26 | 12.38 | 6.20  |
| N296 | 2549.39 | 2.75 | 73.179  | 0.452 | 51.93 | 17.43 | 52.63 |
| N297 | 2548.25 | 3.44 | 494.465 | 0.073 | 57.65 | 6.69  | 22.33 |
| N298 | 2549.78 | 1.70 | 357.175 | 0.494 | 67.79 | 18.10 | 21.12 |
| N299 | 2549.96 | 1.58 | 395.221 | 0.357 | 67.16 | 15.51 | 10.75 |
| N300 | 2549.45 | 1.74 | 471.617 | 0.395 | 44.71 | 15.15 | 9.35  |
| N301 | 2550.02 | 1.55 | 378.453 | 0.472 | 94.20 | 17.78 | 53.33 |
| N302 | 2549.92 | 1.50 | 148.663 | 0.378 | 72.48 | 15.58 | 20.79 |

---

|      |         |      |         |       |       |       |        |
|------|---------|------|---------|-------|-------|-------|--------|
| N303 | 2550    | 1.61 | 88.411  | 0.149 | 95.00 | 9.42  | 23.75  |
| N304 | 2548.05 | 3.98 | 607.617 | 0.088 | 89.30 | 7.37  | 28.74  |
| N305 | 2549.88 | 1.70 | 382.946 | 0.608 | 81.01 | 16.95 | 47.09  |
| N306 | 2550.42 | 1.33 | 394.541 | 0.383 | 93.52 | 15.71 | 11.54  |
| N307 | 2550.56 | 1.38 | 384.811 | 0.395 | 95.00 | 15.71 | 16.21  |
| N308 | 2549.82 | 1.58 | 379.274 | 0.385 | 95.00 | 16.03 | 22.33  |
| N309 | 2549.96 | 1.86 | 372.502 | 0.379 | 95.00 | 15.40 | 27.98  |
| N310 | 2549.42 | 1.77 | 232.692 | 0.373 | 95.00 | 15.80 | 22.24  |
| N311 | 2550.21 | 1.42 | 268.535 | 0.233 | 89.96 | 12.03 | 11.17  |
| N312 | 2550.55 | 1.59 | 223.667 | 0.269 | 95.00 | 12.73 | 35.59  |
| N313 | 2550.3  | 1.27 | 270.052 | 0.224 | 95.00 | 11.46 | 9.85   |
| N314 | 2550.19 | 1.44 | 369.476 | 0.270 | 95.00 | 12.74 | 12.34  |
| N315 | 2549.56 | 1.80 | 328.315 | 0.369 | 95.00 | 15.12 | 17.92  |
| N316 | 2549.93 | 1.41 | 422.317 | 0.328 | 72.16 | 14.29 | 52.63  |
| N317 | 2550.52 | 1.17 | 394.623 | 0.422 | 95.00 | 16.69 | 21.20  |
| N318 | 2550.23 | 1.37 | 805.683 | 0.395 | 92.03 | 15.71 | 40.16  |
| N319 | 2549.21 | 2.07 | 136.994 | 0.806 | 66.06 | 22.41 | 89.40  |
| N320 | 2549.32 | 1.82 | 100.677 | 0.137 | 95.00 | 9.24  | 34.72  |
| N321 | 2549.2  | 2.14 | 176.291 | 0.101 | 95.00 | 8.00  | 30.66  |
| N322 | 2549.19 | 2.21 | 183.506 | 0.176 | 92.45 | 10.36 | 31.37  |
| N323 | 2550.36 | 1.96 | 125.237 | 0.184 | 91.34 | 10.14 | 30.66  |
| N324 | 2550.28 | 2.07 | 197.328 | 0.125 | 95.00 | 8.19  | 18.47  |
| N325 | 2550.63 | 1.17 | 339.861 | 0.197 | 71.23 | 11.27 | 18.47  |
| N326 | 2550.12 | 1.43 | 603.667 | 0.340 | 85.48 | 13.10 | 65.06  |
| N327 | 2549.98 | 1.56 | 150.234 | 0.604 | 76.38 | 19.39 | 109.76 |
| N328 | 2550.5  | 1.10 | 860.644 | 0.150 | 95.00 | 8.39  | 41.96  |
| N329 | 2550.63 | 1.31 | 219.660 | 0.861 | 62.79 | 22.57 | 117.97 |
| N330 | 2549.96 | 1.55 | 144.489 | 0.220 | 0.00  | 9.53  | 82.03  |
| N331 | 2550.4  | 1.48 | 166.080 | 0.144 | 93.41 | 9.24  | 18.47  |
| N332 | 2550.07 | 1.82 | 102.927 | 0.166 | 77.48 | 9.67  | 54.61  |
| N333 | 2549.75 | 1.69 | 107.176 | 0.103 | 72.97 | 8.16  | 29.01  |
| N334 | 2549.36 | 1.75 | 80.347  | 0.107 | 95.00 | 7.89  | 24.08  |
| N335 | 2549.47 | 1.50 | 183.147 | 0.080 | 95.00 | 6.10  | 30.03  |
| N336 | 2549.84 | 1.85 | 124.073 | 0.183 | 95.00 | 10.14 | 30.66  |
| N337 | 2549.91 | 1.87 | 246.000 | 0.124 | 94.15 | 8.30  | 18.52  |
| N338 | 2550.1  | 1.68 | 212.950 | 0.246 | 95.00 | 12.27 | 24.22  |
| N339 | 2550.44 | 1.60 | 99.203  | 0.213 | 95.00 | 11.77 | 18.47  |
| N340 | 2550.71 | 1.28 | 170.797 | 0.191 | 95.00 | 10.63 | 18.47  |
| N341 | 2550.81 | 1.34 | 260.183 | 0.099 | 95.00 | 7.76  | 18.69  |
| N342 | 2550.48 | 1.59 | 116.046 | 0.171 | 95.00 | 10.52 | 21.95  |
| N343 | 2550.8  | 1.39 | 158.140 | 0.260 | 70.57 | 12.67 | 146.29 |
| N344 | 2550.46 | 1.42 | 144.188 | 0.116 | 95.00 | 7.62  | 22.15  |
| N345 | 2549.96 | 1.63 | 269.720 | 0.158 | 95.00 | 10.26 | 38.27  |
| N346 | 2550.19 | 1.49 | 267.854 | 0.144 | 95.00 | 9.83  | 18.63  |
| N347 | 2549.96 | 1.50 | 257.516 | 0.270 | 95.00 | 12.76 | 30.66  |
| N348 | 2549.28 | 2.01 | 199.159 | 0.268 | 69.25 | 12.54 | 30.66  |
| N349 | 2549.12 | 2.37 | 338.345 | 0.258 | 78.47 | 12.12 | 31.56  |
| N350 | 2549.37 | 1.98 | 128.750 | 0.199 | 95.00 | 10.36 | 32.98  |
| N351 | 2550.25 | 1.20 | 175.624 | 0.338 | 82.44 | 14.71 | 39.11  |
| N352 | 2549.64 | 1.88 | 180.587 | 0.129 | 95.00 | 7.48  | 34.24  |
| N353 | 2549.42 | 2.02 | 170.542 | 0.176 | 81.66 | 9.32  | 31.36  |

|      |         |      |          |       |       |       |       |
|------|---------|------|----------|-------|-------|-------|-------|
| N354 | 2550.66 | 1.36 | 200.109  | 0.181 | 94.99 | 8.33  | 32.97 |
| N355 | 2550.42 | 1.25 | 172.771  | 0.171 | 82.18 | 10.05 | 30.50 |
| N356 | 2549.79 | 1.82 | 194.241  | 0.200 | 79.90 | 10.93 | 21.52 |
| N357 | 2550.51 | 1.39 | 379.341  | 0.173 | 95.00 | 9.84  | 18.54 |
| N358 | 2550.47 | 1.49 | 270.360  | 0.194 | 82.29 | 8.99  | 26.26 |
| N359 | 2550.9  | 1.44 | 41.427   | 0.379 | 72.13 | 15.83 | 21.54 |
| N360 | 2551.08 | 1.34 | 181.039  | 0.270 | 92.58 | 13.47 | 20.92 |
| N361 | 2550.75 | 1.49 | 65.451   | 0.041 | 85.68 | 4.57  | 38.18 |
| N362 | 2551.25 | 1.24 | 339.401  | 0.181 | 77.30 | 10.49 | 29.56 |
| N363 | 2550.59 | 1.43 | 168.039  | 0.065 | 95.00 | 6.06  | 31.84 |
| N364 | 2551.04 | 1.24 | 121.213  | 0.339 | 67.62 | 14.58 | 25.36 |
| N365 | 2551.05 | 1.18 | 307.332  | 0.168 | 95.00 | 10.58 | 22.46 |
| N366 | 2550.32 | 1.34 | 1012.394 | 0.121 | 87.85 | 5.96  | 49.94 |
| N367 | 2549.16 | 2.11 | 173.207  | 0.307 | 76.34 | 12.67 | 84.22 |
| N368 | 2549.12 | 2.13 | 153.668  | 1.012 | 63.73 | 24.89 | 79.26 |
| N369 | 2549.06 | 2.02 | 158.299  | 0.173 | 87.28 | 9.58  | 30.66 |
| N370 | 2549.8  | 1.50 | 240.938  | 0.154 | 78.62 | 8.67  | 30.66 |
| N371 | 2549.05 | 1.89 | 183.644  | 0.158 | 89.82 | 8.66  | 31.34 |
| N372 | 2548.92 | 2.15 | 923.271  | 0.241 | 87.81 | 12.78 | 34.63 |
| N373 | 2550.1  | 1.54 | 217.700  | 0.184 | 71.82 | 10.73 | 41.87 |
| N374 | 2549.04 | 2.88 | 206.518  | 0.923 | 61.85 | 23.83 | 93.28 |
| N375 | 2550.35 | 1.26 | 172.069  | 0.218 | 62.64 | 11.99 | 42.03 |
| N376 | 2548.4  | 2.51 | 212.113  | 0.207 | 86.10 | 11.73 | 42.04 |
| N377 | 2549.98 | 1.81 | 109.398  | 0.172 | 95.00 | 9.67  | 10.13 |
| N378 | 2548.93 | 2.24 | 217.653  | 0.212 | 70.33 | 10.56 | 11.29 |
| N379 | 2550.21 | 1.29 | 228.645  | 0.109 | 94.63 | 8.12  | 28.11 |
| N380 | 2550.16 | 1.38 | 50.127   | 0.218 | 86.68 | 10.19 | 13.16 |
| N381 | 2550.33 | 1.66 | 115.424  | 0.229 | 78.44 | 12.03 | 19.74 |
| N382 | 2549.6  | 2.54 | 603.119  | 0.050 | 95.00 | 4.94  | 28.23 |
| N383 | 2548.16 | 3.46 | 372.686  | 0.115 | 69.40 | 7.94  | 22.33 |
| N384 | 2550.27 | 1.74 | 191.156  | 0.603 | 77.85 | 19.79 | 29.80 |
| N385 | 2547.41 | 3.00 | 1834.982 | 0.373 | 62.80 | 15.42 | 83.52 |

Table S5. Data for pipes in the ES-N network

| Link ID | Node 1 | Node 2 | Length (m) | Manning Roughness | Diameter (m) |
|---------|--------|--------|------------|-------------------|--------------|
| P01     | N62    | N195   | 100.23     | 0.015             | 0.4          |
| P02     | N228   | N150   | 39.27      | 0.015             | 0.7          |
| P03     | N223   | N175   | 64.93      | 0.015             | 0.6          |
| P04     | N175   | N244   | 97.58      | 0.015             | 0.6          |
| P05     | N293   | N179   | 80.01      | 0.015             | 0.5          |
| P06     | N154   | N168   | 74.35      | 0.015             | 0.6          |
| P07     | N168   | N155   | 64.06      | 0.015             | 0.6          |
| P08     | N233   | N258   | 105.33     | 0.015             | 0.4          |
| P09     | N251   | N278   | 80.10      | 0.015             | 0.5          |
| P10     | N67    | N314   | 51.67      | 0.015             | 0.3          |
| P11     | N66    | N248   | 113.77     | 0.015             | 0.4          |
| P12     | N319   | N321   | 42.40      | 0.015             | 0.8          |
| P13     | N34    | N197   | 14.50      | 0.015             | 0.3          |
| P14     | N332   | N320   | 26.53      | 0.015             | 0.35         |

---

|     |      |      |        |       |      |
|-----|------|------|--------|-------|------|
| P15 | N370 | N369 | 61.94  | 0.015 | 0.4  |
| P16 | N347 | N348 | 45.21  | 0.015 | 0.35 |
| P17 | N349 | N374 | 45.78  | 0.015 | 0.8  |
| P18 | N374 | N259 | 50.57  | 0.015 | 0.8  |
| P19 | N348 | N349 | 60.05  | 0.015 | 0.8  |
| P20 | N352 | N04  | 106.66 | 0.015 | 0.6  |
| P21 | N219 | N309 | 60.42  | 0.015 | 0.7  |
| P22 | N176 | N309 | 63.12  | 0.015 | 0.4  |
| P23 | N71  | N209 | 99.89  | 0.015 | 0.5  |
| P24 | N356 | N352 | 14.79  | 0.015 | 0.6  |
| P25 | N131 | N254 | 63.25  | 0.015 | 0.4  |
| P26 | N359 | N361 | 15.41  | 0.015 | 0.3  |
| P27 | N209 | N156 | 93.31  | 0.015 | 0.5  |
| P28 | N56  | N193 | 110.23 | 0.015 | 0.5  |
| P29 | N115 | N253 | 79.79  | 0.015 | 0.7  |
| P30 | N253 | N279 | 23.89  | 0.015 | 0.7  |
| P31 | N33  | N236 | 60.12  | 0.015 | 0.4  |
| P32 | N225 | N147 | 91.29  | 0.015 | 0.6  |
| P33 | N375 | N203 | 17.21  | 0.015 | 0.3  |
| P34 | N229 | N205 | 21.09  | 0.015 | 0.3  |
| P35 | N152 | N151 | 61.48  | 0.015 | 0.6  |
| P36 | N37  | N132 | 52.99  | 0.015 | 0.3  |
| P37 | N289 | N305 | 60.09  | 0.015 | 0.6  |
| P38 | N308 | N256 | 58.88  | 0.015 | 0.5  |
| P39 | N274 | N95  | 77.67  | 0.015 | 0.5  |
| P40 | N102 | N364 | 12.04  | 0.015 | 0.3  |
| P41 | N101 | N384 | 81.87  | 0.015 | 0.4  |
| P42 | N339 | N384 | 32.61  | 0.015 | 0.5  |
| P43 | N325 | N326 | 79.08  | 0.015 | 0.3  |
| P44 | N295 | N315 | 50.08  | 0.015 | 0.4  |
| P45 | N203 | N93  | 23.09  | 0.015 | 0.4  |
| P46 | N365 | N364 | 15.50  | 0.015 | 0.3  |
| P47 | N324 | N103 | 46.69  | 0.015 | 0.35 |
| P48 | N103 | N333 | 73.14  | 0.015 | 0.45 |
| P49 | N357 | N08  | 50.62  | 0.015 | 0.3  |
| P50 | N81  | N08  | 8.07   | 0.015 | 0.5  |
| P51 | N19  | N109 | 36.44  | 0.015 | 0.5  |
| P52 | N194 | N62  | 93.42  | 0.015 | 0.5  |
| P53 | N238 | N162 | 27.98  | 0.015 | 0.4  |
| P54 | N89  | N90  | 17.13  | 0.015 | 0.3  |
| P55 | N341 | N101 | 24.83  | 0.015 | 0.3  |
| P56 | N153 | N140 | 64.87  | 0.015 | 0.45 |
| P57 | N140 | N308 | 61.44  | 0.015 | 0.5  |
| P58 | N93  | N299 | 54.81  | 0.015 | 0.4  |
| P59 | N279 | N191 | 6.18   | 0.015 | 0.7  |
| P60 | N380 | N135 | 15.59  | 0.015 | 0.35 |
| P61 | N72  | N165 | 79.85  | 0.015 | 0.4  |
| P62 | N331 | N332 | 35.02  | 0.015 | 0.3  |
| P63 | N230 | N142 | 95.39  | 0.015 | 0.45 |
| P64 | N235 | N380 | 12.01  | 0.015 | 0.3  |
| P65 | N181 | N148 | 92.10  | 0.015 | 0.6  |

---

|      |      |      |        |       |      |
|------|------|------|--------|-------|------|
| P66  | N329 | N331 | 39.83  | 0.015 | 0.3  |
| P67  | N73  | N153 | 65.03  | 0.015 | 0.4  |
| P68  | N192 | N226 | 94.43  | 0.015 | 0.6  |
| P69  | N174 | N147 | 63.26  | 0.015 | 0.7  |
| P70  | N47  | N291 | 59.29  | 0.015 | 0.4  |
| P71  | N78  | N227 | 151.51 | 0.015 | 0.8  |
| P72  | N288 | N159 | 65.40  | 0.015 | 0.4  |
| P73  | N63  | N33  | 61.60  | 0.015 | 0.4  |
| P74  | N373 | N370 | 33.71  | 0.015 | 0.3  |
| P75  | N309 | N292 | 63.05  | 0.015 | 0.7  |
| P76  | N130 | N231 | 65.16  | 0.015 | 0.45 |
| P77  | N77  | N250 | 25.12  | 0.015 | 0.3  |
| P78  | N250 | N249 | 109.57 | 0.015 | 0.4  |
| P79  | N351 | N352 | 25.62  | 0.015 | 0.3  |
| P80  | N355 | N356 | 75.40  | 0.015 | 0.3  |
| P81  | N08  | N356 | 31.88  | 0.015 | 0.5  |
| P82  | N354 | N355 | 35.78  | 0.015 | 0.3  |
| P83  | N138 | N213 | 58.00  | 0.015 | 0.3  |
| P84  | N198 | N290 | 59.71  | 0.015 | 0.3  |
| P85  | N207 | N266 | 61.40  | 0.015 | 0.4  |
| P86  | N12  | N287 | 13.76  | 0.015 | 0.3  |
| P87  | N287 | N238 | 27.88  | 0.015 | 0.4  |
| P88  | N22  | N238 | 48.06  | 0.015 | 0.3  |
| P89  | N150 | N200 | 84.46  | 0.015 | 0.8  |
| P90  | N323 | N324 | 22.71  | 0.015 | 0.3  |
| P91  | N367 | N368 | 16.35  | 0.015 | 0.9  |
| P92  | N106 | N350 | 23.04  | 0.015 | 0.3  |
| P93  | N163 | N06  | 9.75   | 0.015 | 0.7  |
| P94  | N300 | N156 | 62.99  | 0.015 | 0.6  |
| P95  | N262 | N300 | 68.08  | 0.015 | 0.4  |
| P96  | N315 | N300 | 61.16  | 0.015 | 0.6  |
| P97  | N164 | N62  | 63.16  | 0.015 | 0.7  |
| P98  | N79  | N229 | 69.87  | 0.015 | 0.3  |
| P99  | N30  | N205 | 94.16  | 0.015 | 0.3  |
| P100 | N179 | N145 | 87.98  | 0.015 | 0.6  |
| P101 | N145 | N177 | 74.77  | 0.015 | 0.6  |
| P102 | N210 | N71  | 63.39  | 0.015 | 0.5  |
| P103 | N18  | N223 | 45.12  | 0.015 | 0.4  |
| P104 | N193 | N251 | 94.85  | 0.015 | 0.5  |
| P105 | N278 | N225 | 100.09 | 0.015 | 0.6  |
| P106 | N60  | N379 | 80.07  | 0.015 | 0.35 |
| P107 | N100 | N87  | 15.08  | 0.015 | 0.3  |
| P108 | N87  | N88  | 13.93  | 0.015 | 0.3  |
| P109 | N88  | N89  | 38.27  | 0.015 | 0.3  |
| P110 | N212 | N289 | 61.58  | 0.015 | 0.4  |
| P111 | N38  | N242 | 61.86  | 0.015 | 0.3  |
| P112 | N52  | N208 | 34.99  | 0.015 | 0.3  |
| P113 | N90  | N91  | 38.31  | 0.015 | 0.3  |
| P114 | N91  | N268 | 22.29  | 0.015 | 0.6  |
| P115 | N15  | N85  | 64.85  | 0.015 | 0.3  |
| P116 | N360 | N359 | 8.96   | 0.015 | 0.3  |

---

|      |      |      |        |       |      |
|------|------|------|--------|-------|------|
| P117 | N362 | N359 | 40.17  | 0.015 | 0.3  |
| P118 | N364 | N343 | 76.52  | 0.015 | 0.4  |
| P119 | N104 | N343 | 27.12  | 0.015 | 0.3  |
| P120 | N98  | N340 | 32.82  | 0.015 | 0.3  |
| P121 | N69  | N263 | 73.67  | 0.015 | 0.3  |
| P122 | N281 | N154 | 32.44  | 0.015 | 0.6  |
| P123 | N65  | N169 | 68.03  | 0.015 | 0.45 |
| P124 | N377 | N196 | 22.44  | 0.015 | 0.35 |
| P125 | N317 | N151 | 64.99  | 0.015 | 0.35 |
| P126 | N290 | N255 | 41.46  | 0.015 | 0.45 |
| P127 | N61  | N264 | 92.55  | 0.015 | 0.3  |
| P128 | N07  | N182 | 80.44  | 0.015 | 0.5  |
| P129 | N84  | N92  | 18.55  | 0.015 | 0.3  |
| P130 | N92  | N145 | 72.50  | 0.015 | 0.3  |
| P131 | N202 | N283 | 112.00 | 0.015 | 0.6  |
| P132 | N49  | N221 | 74.43  | 0.015 | 0.35 |
| P133 | N160 | N240 | 73.14  | 0.015 | 0.6  |
| P134 | N313 | N247 | 65.15  | 0.015 | 0.4  |
| P135 | N134 | N280 | 36.30  | 0.015 | 1    |
| P136 | N318 | N319 | 44.93  | 0.015 | 0.3  |
| P137 | N333 | N334 | 16.67  | 0.015 | 0.6  |
| P138 | N335 | N334 | 15.62  | 0.015 | 0.6  |
| P139 | N336 | N333 | 30.59  | 0.015 | 0.5  |
| P140 | N330 | N336 | 19.21  | 0.015 | 0.45 |
| P141 | N321 | N322 | 19.05  | 0.015 | 0.8  |
| P142 | N128 | N321 | 58.52  | 0.015 | 0.4  |
| P143 | N310 | N215 | 100.06 | 0.015 | 0.5  |
| P144 | N144 | N219 | 61.09  | 0.015 | 0.4  |
| P145 | N222 | N224 | 60.05  | 0.015 | 0.5  |
| P146 | N28  | N221 | 12.32  | 0.015 | 0.5  |
| P147 | N379 | N204 | 30.96  | 0.015 | 0.35 |
| P148 | N76  | N312 | 73.83  | 0.015 | 0.4  |
| P149 | N197 | N242 | 29.90  | 0.015 | 0.3  |
| P150 | N316 | N210 | 65.29  | 0.015 | 0.4  |
| P151 | N215 | N71  | 91.36  | 0.015 | 0.5  |
| P152 | N266 | N210 | 60.09  | 0.015 | 0.5  |
| P153 | N113 | N07  | 19.46  | 0.015 | 0.2  |
| P154 | N132 | N229 | 29.06  | 0.015 | 0.3  |
| P155 | N13  | N265 | 96.63  | 0.015 | 0.3  |
| P156 | N196 | N265 | 27.89  | 0.015 | 0.4  |
| P157 | N345 | N322 | 59.59  | 0.015 | 0.4  |
| P158 | N96  | N130 | 27.08  | 0.015 | 0.4  |
| P159 | N83  | N281 | 123.42 | 0.015 | 0.6  |
| P160 | N17  | N143 | 42.18  | 0.015 | 0.4  |
| P161 | N172 | N256 | 64.72  | 0.015 | 0.5  |
| P162 | N54  | N273 | 77.91  | 0.015 | 0.5  |
| P163 | N273 | N310 | 80.17  | 0.015 | 0.5  |
| P164 | N256 | N310 | 64.58  | 0.015 | 0.5  |
| P165 | N271 | N219 | 61.62  | 0.015 | 0.6  |
| P166 | N137 | N262 | 65.56  | 0.015 | 0.4  |
| P167 | N291 | N316 | 65.43  | 0.015 | 0.4  |



---

|      |      |      |        |       |      |
|------|------|------|--------|-------|------|
| P168 | N184 | N266 | 65.21  | 0.015 | 0.4  |
| P169 | N242 | N185 | 17.14  | 0.015 | 0.35 |
| P170 | N185 | N214 | 26.83  | 0.015 | 0.35 |
| P171 | N296 | N139 | 17.92  | 0.015 | 0.7  |
| P172 | N46  | N197 | 42.02  | 0.015 | 0.3  |
| P173 | N36  | N258 | 34.04  | 0.015 | 0.3  |
| P174 | N258 | N298 | 64.64  | 0.015 | 0.4  |
| P175 | N298 | N315 | 53.74  | 0.015 | 0.6  |
| P176 | N213 | N198 | 4.77   | 0.015 | 0.3  |
| P177 | N267 | N305 | 64.74  | 0.015 | 0.4  |
| P178 | N211 | N267 | 64.84  | 0.015 | 0.4  |
| P179 | N224 | N276 | 61.65  | 0.015 | 0.6  |
| P180 | N214 | N290 | 34.86  | 0.015 | 0.35 |
| P181 | N53  | N214 | 88.19  | 0.015 | 0.3  |
| P182 | N254 | N96  | 37.63  | 0.015 | 0.4  |
| P183 | N57  | N272 | 117.94 | 0.015 | 0.5  |
| P184 | N246 | N245 | 64.62  | 0.015 | 0.5  |
| P185 | N43  | N302 | 80.79  | 0.015 | 0.3  |
| P186 | N21  | N235 | 80.59  | 0.015 | 0.3  |
| P187 | N135 | N239 | 39.37  | 0.015 | 0.35 |
| P188 | N143 | N220 | 79.77  | 0.015 | 0.6  |
| P189 | N294 | N180 | 8.24   | 0.015 | 0.4  |
| P190 | N180 | N190 | 58.70  | 0.015 | 0.6  |
| P191 | N301 | N131 | 60.00  | 0.015 | 0.4  |
| P192 | N85  | N292 | 23.31  | 0.015 | 0.3  |
| P193 | N186 | N306 | 65.02  | 0.015 | 0.35 |
| P194 | N234 | N05  | 7.42   | 0.015 | 0.7  |
| P195 | N111 | N182 | 10.75  | 0.015 | 0.2  |
| P196 | N09  | N261 | 54.03  | 0.015 | 0.3  |
| P197 | N305 | N286 | 63.14  | 0.015 | 0.7  |
| P198 | N286 | N234 | 21.41  | 0.015 | 0.7  |
| P199 | N157 | N263 | 30.85  | 0.015 | 0.3  |
| P200 | N263 | N264 | 27.22  | 0.015 | 0.3  |
| P201 | N204 | N302 | 44.85  | 0.015 | 0.4  |
| P202 | N302 | N158 | 37.87  | 0.015 | 0.4  |
| P203 | N20  | N313 | 25.33  | 0.015 | 0.3  |
| P204 | N261 | N235 | 29.60  | 0.015 | 0.3  |
| P205 | N322 | N367 | 38.97  | 0.015 | 0.9  |
| P206 | N346 | N345 | 32.94  | 0.015 | 0.3  |
| P207 | N244 | N145 | 16.56  | 0.015 | 0.6  |
| P208 | N173 | N172 | 65.79  | 0.015 | 0.5  |
| P209 | N311 | N173 | 60.04  | 0.015 | 0.5  |
| P210 | N220 | N177 | 80.11  | 0.015 | 0.6  |
| P211 | N11  | N303 | 21.86  | 0.015 | 0.3  |
| P212 | N48  | N317 | 64.92  | 0.015 | 0.35 |
| P213 | N80  | N115 | 41.99  | 0.015 | 0.5  |
| P214 | N167 | N26  | 36.12  | 0.015 | 0.4  |
| P215 | N74  | N167 | 50.22  | 0.015 | 0.4  |
| P216 | N217 | N308 | 64.67  | 0.015 | 0.4  |
| P217 | N170 | N142 | 19.19  | 0.015 | 0.5  |
| P218 | N247 | N174 | 64.67  | 0.015 | 0.4  |

---

|      |      |      |        |       |      |
|------|------|------|--------|-------|------|
| P219 | N27  | N144 | 60.26  | 0.015 | 0.3  |
| P220 | N199 | N164 | 64.82  | 0.015 | 0.45 |
| P221 | N307 | N199 | 65.18  | 0.015 | 0.4  |
| P222 | N14  | N187 | 64.32  | 0.015 | 0.4  |
| P223 | N187 | N212 | 65.50  | 0.015 | 0.4  |
| P224 | N42  | N175 | 88.31  | 0.015 | 0.6  |
| P225 | N200 | N188 | 11.23  | 0.015 | 0.8  |
| P226 | N51  | N228 | 63.78  | 0.015 | 0.6  |
| P227 | N50  | N228 | 41.37  | 0.015 | 0.7  |
| P228 | N64  | N141 | 104.64 | 0.015 | 0.4  |
| P229 | N45  | N140 | 118.04 | 0.015 | 0.4  |
| P230 | N201 | N216 | 37.95  | 0.015 | 0.6  |
| P231 | N110 | N03  | 11.10  | 0.015 | 0.7  |
| P232 | N32  | N233 | 25.02  | 0.015 | 0.3  |
| P233 | N109 | N274 | 25.32  | 0.015 | 0.5  |
| P234 | N239 | N377 | 31.04  | 0.015 | 0.35 |
| P235 | N195 | N286 | 90.33  | 0.015 | 0.5  |
| P236 | N165 | N254 | 75.14  | 0.015 | 0.4  |
| P237 | N312 | N146 | 61.50  | 0.015 | 0.4  |
| P238 | N146 | N271 | 60.10  | 0.015 | 0.5  |
| P239 | N155 | N82  | 21.27  | 0.015 | 0.6  |
| P240 | N112 | N190 | 8.47   | 0.015 | 0.25 |
| P241 | N58  | N202 | 105.02 | 0.015 | 0.5  |
| P242 | N314 | N277 | 47.46  | 0.015 | 0.35 |
| P243 | N25  | N311 | 25.25  | 0.015 | 0.3  |
| P244 | N136 | N157 | 70.75  | 0.015 | 0.3  |
| P245 | N226 | N378 | 14.02  | 0.015 | 0.7  |
| P246 | N119 | N376 | 7.94   | 0.015 | 0.7  |
| P247 | N35  | N293 | 48.95  | 0.015 | 0.4  |
| P248 | N190 | N248 | 60.79  | 0.015 | 0.6  |
| P249 | N248 | N277 | 60.70  | 0.015 | 0.6  |
| P250 | N350 | N348 | 15.61  | 0.015 | 0.8  |
| P251 | N107 | N353 | 6.46   | 0.015 | 0.6  |
| P252 | N208 | N136 | 4.62   | 0.015 | 0.3  |
| P253 | N29  | N07  | 4.30   | 0.015 | 0.5  |
| P254 | N326 | N327 | 19.69  | 0.015 | 0.35 |
| P255 | N328 | N327 | 77.50  | 0.015 | 0.3  |
| P256 | N327 | N330 | 25.93  | 0.015 | 0.45 |
| P257 | N276 | N249 | 59.79  | 0.015 | 0.6  |
| P258 | N277 | N276 | 34.53  | 0.015 | 0.6  |
| P259 | N24  | N211 | 25.13  | 0.015 | 0.3  |
| P260 | N114 | N312 | 8.93   | 0.015 | 0.3  |
| P261 | N55  | N76  | 7.58   | 0.015 | 0.2  |
| P262 | N75  | N271 | 97.01  | 0.015 | 0.3  |
| P263 | N26  | N176 | 62.09  | 0.015 | 0.4  |
| P264 | N264 | N158 | 29.38  | 0.015 | 0.4  |
| P265 | N381 | N100 | 34.91  | 0.015 | 0.3  |
| P266 | N243 | N166 | 61.92  | 0.015 | 0.4  |
| P267 | N292 | N296 | 21.99  | 0.015 | 0.7  |
| P268 | N31  | N181 | 89.72  | 0.015 | 0.6  |
| P269 | N156 | N283 | 63.07  | 0.015 | 0.7  |

---

|      |      |      |        |       |      |
|------|------|------|--------|-------|------|
| P270 | N120 | N243 | 17.72  | 0.015 | 0.4  |
| P271 | N177 | N216 | 22.79  | 0.015 | 0.7  |
| P272 | N249 | N278 | 63.43  | 0.015 | 0.6  |
| P273 | N236 | N285 | 65.10  | 0.015 | 0.4  |
| P274 | N237 | N301 | 65.49  | 0.015 | 0.35 |
| P275 | N218 | N152 | 64.84  | 0.015 | 0.45 |
| P276 | N334 | N320 | 22.54  | 0.015 | 0.6  |
| P277 | N320 | N319 | 34.43  | 0.015 | 0.7  |
| P278 | N363 | N344 | 60.06  | 0.015 | 0.45 |
| P279 | N99  | N342 | 28.03  | 0.015 | 0.45 |
| P280 | N343 | N99  | 39.88  | 0.015 | 0.4  |
| P281 | N361 | N363 | 25.24  | 0.015 | 0.4  |
| P282 | N231 | N134 | 70.07  | 0.015 | 0.45 |
| P283 | N169 | N201 | 70.74  | 0.015 | 0.6  |
| P284 | N141 | N201 | 28.79  | 0.015 | 0.4  |
| P285 | N353 | N350 | 67.23  | 0.015 | 0.8  |
| P286 | N245 | N174 | 59.98  | 0.015 | 0.6  |
| P287 | N272 | N245 | 61.74  | 0.015 | 0.6  |
| P288 | N70  | N138 | 62.97  | 0.015 | 0.3  |
| P289 | N86  | N97  | 14.02  | 0.015 | 0.8  |
| P290 | N188 | N94  | 10.77  | 0.015 | 0.8  |
| P291 | N94  | N86  | 154.65 | 0.015 | 0.8  |
| P292 | N118 | N189 | 10.75  | 0.015 | 0.7  |
| P293 | N166 | N01  | 49.75  | 0.015 | 0.4  |
| P294 | N121 | N120 | 26.96  | 0.015 | 0.25 |
| P295 | N23  | N230 | 90.10  | 0.015 | 0.4  |
| P296 | N151 | N164 | 60.16  | 0.015 | 0.6  |
| P297 | N39  | N291 | 25.99  | 0.015 | 0.3  |
| P298 | N221 | N222 | 22.79  | 0.015 | 0.5  |
| P299 | N108 | N372 | 34.64  | 0.015 | 0.9  |
| P300 | N372 | N383 | 73.26  | 0.015 | 0.9  |
| P301 | N366 | N367 | 66.12  | 0.015 | 0.3  |
| P302 | N368 | N105 | 27.81  | 0.015 | 0.9  |
| P303 | N105 | N369 | 26.16  | 0.015 | 0.9  |
| P304 | N337 | N335 | 79.51  | 0.015 | 0.6  |
| P305 | N338 | N337 | 43.56  | 0.015 | 0.6  |
| P306 | N358 | N338 | 59.81  | 0.015 | 0.4  |
| P307 | N265 | N162 | 31.93  | 0.015 | 0.4  |
| P308 | N162 | N161 | 31.89  | 0.015 | 0.6  |
| P309 | N306 | N289 | 64.78  | 0.015 | 0.4  |
| P310 | N148 | N192 | 98.89  | 0.015 | 0.6  |
| P311 | N44  | N137 | 24.89  | 0.015 | 0.3  |
| P312 | N285 | N131 | 65.57  | 0.015 | 0.4  |
| P313 | N299 | N298 | 49.66  | 0.015 | 0.4  |
| P314 | N59  | N295 | 85.95  | 0.015 | 0.35 |
| P315 | N283 | N282 | 17.81  | 0.015 | 0.9  |
| P316 | N240 | N91  | 15.77  | 0.015 | 0.6  |
| P317 | N158 | N160 | 41.67  | 0.015 | 0.6  |
| P318 | N344 | N339 | 13.02  | 0.015 | 0.45 |
| P319 | N342 | N339 | 20.31  | 0.015 | 0.45 |
| P320 | N340 | N339 | 61.94  | 0.015 | 0.4  |

---

|      |      |      |        |       |      |
|------|------|------|--------|-------|------|
| P321 | N95  | N146 | 39.41  | 0.015 | 0.5  |
| P322 | N303 | N287 | 27.03  | 0.015 | 0.4  |
| P323 | N369 | N371 | 27.46  | 0.015 | 0.9  |
| P324 | N371 | N108 | 21.46  | 0.015 | 0.9  |
| P325 | N159 | N301 | 61.56  | 0.015 | 0.4  |
| P326 | N205 | N303 | 30.31  | 0.015 | 0.35 |
| P327 | N122 | N121 | 4.88   | 0.015 | 0.25 |
| P328 | N123 | N122 | 38.51  | 0.015 | 0.25 |
| P329 | N68  | N313 | 60.06  | 0.015 | 0.4  |
| P330 | N124 | N123 | 41.91  | 0.015 | 0.25 |
| P331 | N126 | N125 | 4.03   | 0.015 | 0.2  |
| P332 | N129 | N269 | 13.61  | 0.015 | 0.3  |
| P333 | N97  | N149 | 28.59  | 0.015 | 0.9  |
| P334 | N40  | N171 | 63.03  | 0.015 | 0.3  |
| P335 | N171 | N270 | 32.08  | 0.015 | 0.3  |
| P336 | N270 | N243 | 3.85   | 0.015 | 0.3  |
| P337 | N16  | N218 | 65.08  | 0.015 | 0.4  |
| P338 | N182 | N180 | 54.71  | 0.015 | 0.5  |
| P339 | N10  | N194 | 61.84  | 0.015 | 0.3  |
| P340 | N125 | N124 | 28.17  | 0.015 | 0.2  |
| P341 | N147 | N118 | 8.56   | 0.015 | 0.7  |
| P342 | N161 | N206 | 99.71  | 0.015 | 1.3  |
| P343 | N216 | N142 | 22.62  | 0.015 | 1.2  |
| P344 | N259 | N03  | 17.42  | 0.015 | 1.4  |
| P345 | N149 | N378 | 19.38  | 0.015 | 1.2  |
| P346 | N304 | N282 | 116.49 | 0.015 | 1.4  |
| P347 | N116 | N117 | 11.51  | 0.015 | 1.4  |
| P348 | N206 | N05  | 69.09  | 0.015 | 1.4  |
| P349 | N133 | N257 | 106.37 | 0.015 | 1.4  |
| P350 | N183 | N191 | 80.02  | 0.015 | 1.3  |
| P351 | N255 | N139 | 80.25  | 0.015 | 1.3  |
| P352 | N232 | N383 | 64.37  | 0.015 | 1.4  |
| P353 | N02  | N275 | 55.67  | 0.015 | 1.3  |
| P354 | N139 | N268 | 95.48  | 0.015 | 1.3  |
| P355 | N383 | N280 | 79.71  | 0.015 | 1.4  |
| P356 | N178 | N376 | 82.29  | 0.015 | 1.4  |
| P357 | N191 | N02  | 12.96  | 0.015 | 1.3  |
| P358 | N227 | N149 | 102.71 | 0.015 | 1.2  |
| P359 | N01  | N297 | 70.92  | 0.015 | 1.4  |
| P360 | N275 | N116 | 79.79  | 0.015 | 1.3  |
| P361 | N252 | N183 | 92.44  | 0.015 | 1.3  |
| P362 | N260 | N259 | 46.60  | 0.015 | 1.4  |
| P363 | N282 | N82  | 19.77  | 0.015 | 1.4  |
| P364 | N03  | N232 | 72.96  | 0.015 | 1.4  |
| P365 | N378 | N252 | 37.35  | 0.015 | 1.1  |
| P366 | N376 | N01  | 28.89  | 0.015 | 1.4  |
| P367 | N268 | N06  | 81.05  | 0.015 | 1.3  |
| P368 | N05  | N284 | 30.95  | 0.015 | 1.4  |
| P369 | N41  | N382 | 70.31  | 0.015 | 0.9  |
| P370 | N142 | N255 | 79.96  | 0.015 | 1.3  |
| P371 | N117 | N189 | 13.40  | 0.015 | 1.4  |

|      |      |        |        |       |     |
|------|------|--------|--------|-------|-----|
| P372 | N297 | N241   | 100.05 | 0.015 | 1.4 |
| P373 | N284 | N04    | 8.84   | 0.015 | 1.4 |
| P374 | N189 | N178   | 103.66 | 0.015 | 1.4 |
| P375 | N04  | N260   | 90.32  | 0.015 | 1.4 |
| P376 | N382 | N269   | 76.43  | 0.015 | 0.9 |
| P377 | N269 | N216   | 90.05  | 0.015 | 1.2 |
| P378 | N06  | N161   | 16.81  | 0.015 | 1.3 |
| P379 | N280 | N133   | 38.17  | 0.015 | 1.4 |
| P380 | N257 | N82    | 178.19 | 0.015 | 1.4 |
| P381 | N127 | N304   | 84.51  | 0.015 | 1.4 |
| P382 | N241 | N127   | 50.36  | 0.015 | 1.4 |
| P383 | N384 | N338   | 65.07  | 0.015 | 0.6 |
| P384 | N385 | V87702 | 50.00  | 0.015 | 1.4 |
| P385 | N82  | N385   | 160.53 | 0.015 | 1.4 |

**Table S6.** Land uses in the study area of ES-N network

| Land Uses       | Percentage |
|-----------------|------------|
| Restaurant      | 8.17%      |
| Road            | 23.28%     |
| General trading | 24.42%     |
| Dwelling        | 32.31%     |
| Sports          | 1.25%      |
| Green Zones     | 3.08%      |
| Health          | 1.24%      |
| Office          | 4.55%      |
| Education       | 1.12%      |
| Churches        | 0.58%      |

### 3. Goodness of Fit for Land Uses Curves

**Table S7.** Goodness of fit for the different land uses with Equation 5.

| Type                            | SSE                | R-Square | Adjusted R-Square | RMSE   |
|---------------------------------|--------------------|----------|-------------------|--------|
| Restaurant                      | $1.01 \times 10^4$ | 0.99     | 0.99              | 44.97  |
| Sports                          | $2.07 \times 10^3$ | 0.99     | 0.99              | 18.59  |
| Education                       | $5.40 \times 10$   | 1.00     | 1.00              | 3.00   |
| Hotels                          | $8.46 \times 10^2$ | 1.00     | 1.00              | 13.01  |
| Industries                      | $1.25 \times 10^5$ | 0.97     | 0.97              | 157.90 |
| Office                          | $1.95 \times 10^4$ | 0.98     | 0.97              | 62.49  |
| Health                          | $5.40 \times 10^4$ | 0.99     | 0.99              | 103.90 |
| Warehouse                       | $1.94 \times 10^4$ | 0.99     | 0.99              | 62.31  |
| Car parks                       | $4.58 \times 10^2$ | 0.99     | 0.99              | 9.57   |
| General trading                 | $4.34 \times 10^3$ | 1.00     | 0.99              | 29.44  |
| Dwelling                        | $9.02 \times 10^3$ | 0.97     | 0.96              | 42.48  |
| Workshops                       | $2.47 \times 10^3$ | 0.99     | 0.99              | 22.24  |
| Churches and singular buildings | $2.63 \times 10^3$ | 0.98     | 0.97              | 22.93  |

**Table S8.** Coefficients of equation 5 for different land uses.

| <b>Land Uses</b> | <b>C<sub>max</sub></b> | <b>y<sub>max</sub></b> | <b>λ</b> | <b>v</b> |
|------------------|------------------------|------------------------|----------|----------|
| Restaurant       | 1150                   | 2.20                   | 2.30     | 1.30     |
| Sports           | 550                    | 1.00                   | 4.50     | 1.20     |
| Education        | 520                    | 1.10                   | 4.50     | 1.80     |
| Hotels           | 530                    | 2.20                   | 3.90     | 1.40     |
| Industries       | 2200                   | 2.20                   | 2.89     | 2.69     |
| Office           | 1000                   | 2.00                   | 3.00     | 2.50     |
| Health           | 2500                   | 2.30                   | 2.94     | 1.89     |
| Warehouse        | 1600                   | 1.80                   | 1.80     | 1.50     |
| Car_parks        | 205                    | 2.00                   | 7.38     | 76.74    |
| General_trading  | 1025                   | 2.00                   | 2.90     | 2.60     |
| Dwelling         | 565                    | 2.00                   | 2.45     | 1.63     |
| Workshops        | 710                    | 1.50                   | 2.30     | 1.90     |
| Churches         | 400                    | 2.70                   | 2.77     | 1.87     |
